# Supplementary material for: Antioxidant Effects of Walnut (Juglans regia L.) Kernel and Walnut Septum Extract in a D-Galactose-Induced Aging Model and in Naturally Aged Rats
Source: PubMed Central journal article supplement (PMC7278598; doi:10.3390/antiox9050424), 2020-05-14
Supplement: antioxidants-09-00424-s001.pdf [file antioxidants-09-00424-s001.pdf]

## Supplementary Materials:

**Table S1.** Analysis of hematological indices in naturally aged rats.

| Indices                               | CO               | WK                            | WSE                           |
|---------------------------------------|------------------|-------------------------------|-------------------------------|
| WBC ( $\times 10^3 \text{ mm}^{-3}$ ) | 6.86 $\pm$ 0.76  | 6.98 $\pm$ 1.20               | 7.98 $\pm$ 0.78               |
| LY (%)                                | 64.86 $\pm$ 4.27 | 69.40 $\pm$ 4.72              | 70.84 $\pm$ 4.18              |
| RBC ( $\times 10^6 \text{ mm}^{-3}$ ) | 8.75 $\pm$ 0.37  | 8.45 $\pm$ 0.53               | 8.88 $\pm$ 0.30               |
| HGB (g/dL)                            | 14.80 $\pm$ 0.59 | 14.56 $\pm$ 0.61              | 15.86 $\pm$ 0.52 <sup>#</sup> |
| HCT (%)                               | 38.91 $\pm$ 1.49 | 38.70 $\pm$ 1.46              | 42.18 $\pm$ 1.1 <sup>#</sup>  |
| PLT ( $\times 10^3 \text{ mm}^{-3}$ ) | 592.1 $\pm$ 14.9 | 576.8 $\pm$ 40.3 <sup>#</sup> | 632.0 $\pm$ 43.1              |

Values expressed as mean  $\pm$  SD (n=8);<sup>#</sup>p < 0.05 compared to CO (CO – control old; WK – walnut kernel; WSE – walnut septum extract; WBC – white blood cells, LY – lymphocytes, RBC – red blood cells, HGB – hemoglobin, HCT – hematocrit, PLT – platelets).

**Table S2.** Individual phytochemicals found in walnut septum [6].

| Y <sub>1</sub> | Y <sub>2</sub> | Y <sub>3</sub> | Y <sub>4</sub> | Y <sub>5</sub> | Y <sub>6</sub> | Y <sub>7</sub> | Y <sub>8</sub> | Y <sub>9</sub> | Y <sub>10</sub> | Y <sub>11</sub> |
|----------------|----------------|----------------|----------------|----------------|----------------|----------------|----------------|----------------|-----------------|-----------------|
| 1.25           | 59.76          | 0.52           | 7.96           | 0.99           | 0.56           | 6.73           | 10.36          | 107.31         | 29.21           | 3101.8          |

Y<sub>1</sub>–Epicatechin; Y<sub>2</sub>–Catechin; Y<sub>3</sub>–Syringic acid; Y<sub>4</sub>–Gallic acid; Y<sub>5</sub>–Protocatechuic acid; Y<sub>6</sub>–Vanillic acid; Y<sub>7</sub>–Hyperoside; Y<sub>8</sub>–Isoquercitrin; Y<sub>9</sub>–Quercitrin; Y<sub>10</sub>–Campesterol; Y<sub>11</sub>– $\beta$ -Sitosterol. All amounts are mg/100g.

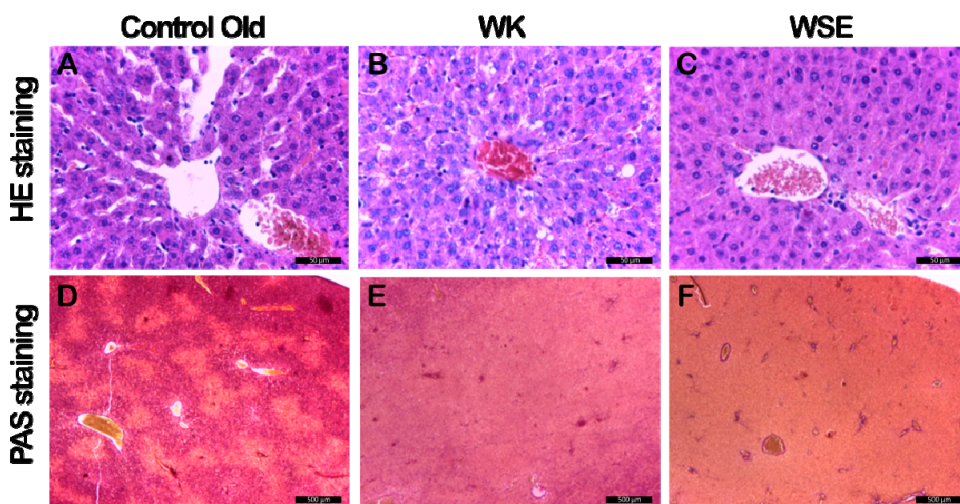

**Figure S1.** Hepatic HE and PAS staining analyses in naturally aged rats (WK – walnut kernel; WSE – walnut septum extract).
